# Supplementary material for: Polysaccharides from Ulva prolifera O.F. Müller inhibit cell proliferation via activating MAPK signaling in A549 and H1650 cells
Source: Royal Society of Chemistry journal article supplement (doi:10.1039/d1fo00294e), 2021-01-01
Supplement: d1fo00294e1.pdf [file d1fo00294e1.pdf]

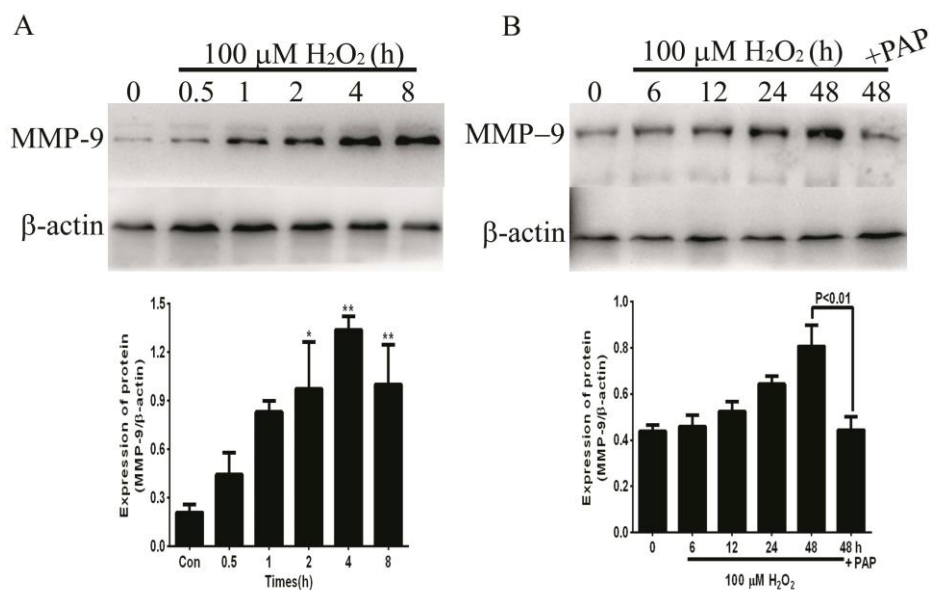

Figure S1 Effect of  $H_2O_2$  on MMP-9 activation in NCI-H1650 cells. (A)  $H_2O_2$  induced MMP-9 expression in a time-dependent manner. (B) Western blot analyses showed that 100  $\mu M$   $H_2O_2$  induced MMP-9 secretion in a time-dependent manner, and pre-treatment of 400  $\mu g/mL$  PAP decreased MMP-9 protein. \* $P < 0.05$ , \*\* $P < 0.01$  vs. Con.

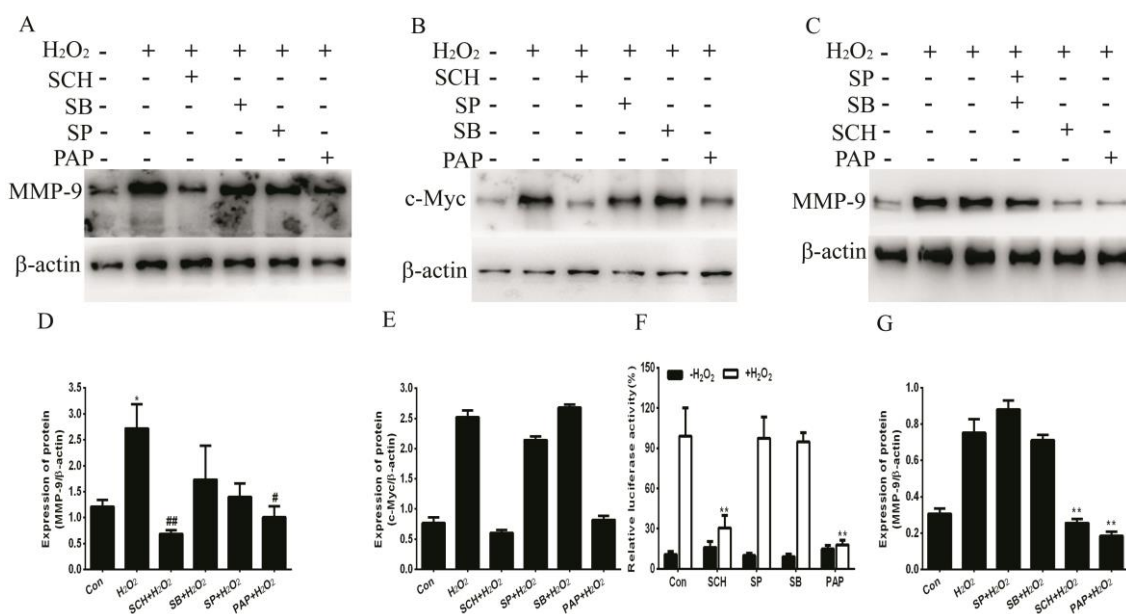

Figure S2 Regulation of MMP-9 transcriptions are dependent on ERK/c-Myc activities in NCI-H1650 cells. (A)  $H_2O_2$ -induced MMP-9 expression was associated with increased ERK signaling in NCI-H1650 cells. The results represent as mean  $\pm$  SD, and \* $P < 0.05$  vs. Con; # $P < 0.05$ , ## $P < 0.01$ , vs.  $H_2O_2$  group. (B, E) ERK inhibitor SCH772984 and PAP effectively inhibited  $H_2O_2$ -induced c-Myc translocation. \*\* $P < 0.01$ , vs.  $H_2O_2$  group. (F) PAP suppressed  $H_2O_2$ -induced c-Myc transcriptional activity, the relative luciferase activities were normalized to pRL-TK Renilla luciferase. (C, G) Pre-treatment with PAP, SCH772984 prior to  $H_2O_2$  significantly reduced

the expression of MMP-9. The results represent as mean  $\pm$  SD, and  $**P < 0.01$  vs. H<sub>2</sub>O<sub>2</sub> group.
